## Correction: MiR-34a-5p promotes the multi-drug resistance of osteosarcoma by targeting the CD117 gene

**Shanbao Cai<sup>1,6,\*</sup>, Youguang Pu<sup>1,\*</sup>, Fangfang Zhao<sup>1,\*</sup>, Haiyan Wang<sup>2</sup>, Wenjing Cai<sup>3</sup>, Jin Gao<sup>4</sup> and Yinpeng Li<sup>5</sup>**

<sup>1</sup> Cancer Epigenetics Program, Anhui Cancer Hospital, West District of Anhui Provincial Hospital, Hefei 230031, Anhui, China

<sup>2</sup> Department of Clinical Geriatrics, Anhui Provincial Hospital, Hefei 230031, Anhui, China

<sup>3</sup> Indiana University School of Medicine, Indianapolis, IN 46202, USA

<sup>4</sup> Department of Radiation Oncology, Anhui Cancer Hospital, West District of Anhui Provincial Hospital, Hefei 230031, Anhui, China

<sup>5</sup> Xinxiang Medical University, Xinxiang 453000, Henan, China

<sup>6</sup> Department of Orthopedic Surgery, Anhui Cancer Hospital, West District of Anhui Provincial Hospital, Hefei 230031, Anhui, China

\* These authors have contributed equally to this work

**Published:** September 01, 2017

Copyright: Cai et al. This is an open-access article distributed under the terms of the Creative Commons Attribution License 3.0 (CC BY 3.0), which permits unrestricted use, distribution, and reproduction in any medium, provided the original author and source are credited.

**This article has been corrected:** Dr. Shanbao Cai was moved to the first position in the author list. The authors sincerely apologize for this oversight.

Original article: Oncotarget. 2016; 7:28420-28434. <https://doi.org/10.18632/oncotarget.8546>
